# Supplementary material
Source: MDPI journal article supplement (https://www.mdpi.com/2073-4352/2/4/1374)
Supplement: s2 [file s2]

data_50
_publ_requested_journal          'Z.Kristallogr.-New Cryst.Struct.'
_publ_contact_author_name        'Fabienne Gschwind'
_publ_contact_author_address     
;Max-Planck-Institute for Solid State Research
Heisenbergstrasse 1
70569 Suttgart
Germany
;
_publ_contact_author_email       F.gschwind@fkf.mpg.de
loop_
_publ_author_name
_publ_author_address
'Gschwind, Fabienne'
;Max-Planck-Institute for Solid State Research
Heisenbergstrasse 1
70569 Suttgart
Germany
;
'Jansen, Martin'
;Max-Planck-Institute for Solid State Research
Heisenbergstrasse 1
70569 Suttgart
Germany
;

_audit_update_record             
;
2011-03-29 # Formatted by publCIF
;

_audit_creation_method           SHELXL-97
_chemical_name_systematic        bismuthethandisulfonato
_chemical_name_common            ?
_chemical_formula_moiety         'C3 H10 Bi O11 S3'
_chemical_formula_sum            'C3 H10 Bi O11 S3'
_exptl_crystal_recrystallization_method 'slow evaporation'
_chemical_melting_point          ?

_exptl_crystal_description       bloc
_exptl_crystal_colour            colorless

_diffrn_ambient_temperature      293(2)
_chemical_formula_weight         527.27

loop_
_atom_type_symbol
_atom_type_description
_atom_type_scat_dispersion_real
_atom_type_scat_dispersion_imag
_atom_type_scat_source
C C 0.0033 0.0016 'International Tables Vol C Tables 4.2.6.8 and 6.1.1.4'
H H 0.0000 0.0000 'International Tables Vol C Tables 4.2.6.8 and 6.1.1.4'
O O 0.0106 0.0060 'International Tables Vol C Tables 4.2.6.8 and 6.1.1.4'
S S 0.1246 0.1234 'International Tables Vol C Tables 4.2.6.8 and 6.1.1.4'
Bi Bi -4.1077 10.2566 'International Tables Vol C Tables 4.2.6.8 and 6.1.1.4'

_symmetry_cell_setting           monoclinic
_symmetry_space_group_name_H-M   'P 21/c'
_symmetry_int_tables_number      14
_symmetry_space_group_name_Hall  '-P 2ybc'


loop_
_symmetry_equiv_pos_as_xyz
'x, y, z'
'-x, y+1/2, -z+1/2'
'-x, -y, -z'
'x, -y-1/2, z-1/2'

_cell_length_a                   11.601(2)
_cell_length_b                   10.390(2)
_cell_length_c                   10.498(2)
_cell_angle_alpha                90.00
_cell_angle_beta                 115.15(3)
_cell_angle_gamma                90.00
_cell_volume                     1145.3(4)
_cell_formula_units_Z            4
_cell_measurement_temperature    293(2)
_cell_measurement_reflns_used    12498
_cell_measurement_theta_min      1.94
_cell_measurement_theta_max      29.73
_exptl_crystal_size_max          0.180
_exptl_crystal_size_mid          0.120
_exptl_crystal_size_min          0.070
_exptl_crystal_density_meas      ?
_exptl_crystal_density_diffrn    3.058
_exptl_crystal_density_method    'not measured'
_exptl_crystal_F_000             988
_exptl_absorpt_coefficient_mu    15.994
_exptl_absorpt_correction_type   integration
_exptl_absorpt_correction_T_min  0.141
_exptl_absorpt_correction_T_max  0.264
_exptl_absorpt_process_details   ?

_exptl_special_details           
;
 ?
;
_diffrn_radiation_probe          x-ray
_diffrn_radiation_type           MoK\a
_diffrn_radiation_wavelength     0.71073
_diffrn_source                   'fine-focus sealed tube'
_diffrn_radiation_monochromator  graphite
_diffrn_measurement_device_type  'STOE IPDS 2'
_diffrn_measurement_method       'rotation method'
_diffrn_detector_type            STOE
_diffrn_detector_area_resol_mean 6.67
_diffrn_standards_number         ?
_diffrn_standards_interval_count ?
_diffrn_standards_interval_time  ?
_diffrn_standards_decay_%        ?
_diffrn_reflns_number            10299
_diffrn_reflns_av_R_equivalents  0.0434
_diffrn_reflns_av_sigmaI/netI    0.0358
_diffrn_reflns_limit_h_min       -15
_diffrn_reflns_limit_h_max       16
_diffrn_reflns_limit_k_min       -14
_diffrn_reflns_limit_k_max       14
_diffrn_reflns_limit_l_min       -14
_diffrn_reflns_limit_l_max       11
_diffrn_reflns_theta_min         1.94
_diffrn_reflns_theta_max         29.45
_reflns_number_total             3179
_reflns_number_gt                2718
_reflns_threshold_expression     >2sigma(I)

_computing_data_collection       stoe
_computing_cell_refinement       Xred
_computing_data_reduction        Xred
_computing_structure_solution    'SHELXS-97 (Sheldrick, 1990)'
_computing_structure_refinement  'SHELXL-97 (Sheldrick, 1997)'
_computing_molecular_graphics    Diamond
_computing_publication_material  Word

_refine_special_details          
;
 Refinement of F^2^ against ALL reflections.  The weighted R-factor wR and
 goodness of fit S are based on F^2^, conventional R-factors R are based
 on F, with F set to zero for negative F^2^. The threshold expression of
 F^2^ > 2sigma(F^2^) is used only for calculating R-factors(gt) etc. and is
 not relevant to the choice of reflections for refinement.  R-factors based
 on F^2^ are statistically about twice as large as those based on F, and R-
 factors based on ALL data will be even larger.
;

_refine_ls_structure_factor_coef Fsqd
_refine_ls_matrix_type           full
_refine_ls_weighting_scheme      calc
_refine_ls_weighting_details     
'calc w=1/[\s^2^(Fo^2^)+(0.0160P)^2^+1.3729P] where P=(Fo^2^+2Fc^2^)/3'
_atom_sites_solution_primary     direct
_atom_sites_solution_secondary   difmap
_atom_sites_solution_hydrogens   geom
_refine_ls_hydrogen_treatment    mixed
_refine_ls_extinction_method     none
_refine_ls_extinction_coef       ?
_refine_ls_number_reflns         3144
_refine_ls_number_parameters     173
_refine_ls_number_restraints     8
_refine_ls_R_factor_all          0.0386
_refine_ls_R_factor_gt           0.0283
_refine_ls_wR_factor_ref         0.0492
_refine_ls_wR_factor_gt          0.0475
_refine_ls_goodness_of_fit_ref   1.124
_refine_ls_restrained_S_all      2.504
_refine_ls_shift/su_max          0.001
_refine_ls_shift/su_mean         0.000

loop_
_atom_site_label
_atom_site_type_symbol
_atom_site_fract_x
_atom_site_fract_y
_atom_site_fract_z
_atom_site_U_iso_or_equiv
_atom_site_adp_type
_atom_site_occupancy
_atom_site_symmetry_multiplicity
_atom_site_calc_flag
_atom_site_refinement_flags
_atom_site_disorder_assembly
_atom_site_disorder_group
Bi1 Bi 0.27752(3) 0.65404(4) 0.24784(4) 0.01562(11) Uani 1 1 d . . .
C1 C 0.0494(9) 0.5111(10) 0.4718(12) 0.019(2) Uani 1 1 d . . .
H1A H 0.0250 0.4646 0.3841 0.023 Uiso 1 1 calc R . .
H1B H 0.1310 0.4780 0.5385 0.023 Uiso 1 1 calc R . .
C2 C 0.3356(10) 1.1247(10) 0.4137(12) 0.020(2) Uani 1 1 d . . .
H2A H 0.4271 1.1168 0.4471 0.024 Uiso 1 1 calc R . .
H2B H 0.3004 1.1516 0.3160 0.024 Uiso 1 1 calc R . .
C3 C 0.3058(11) 0.2250(10) 0.5003(13) 0.022(2) Uani 1 1 d . . .
H3A H 0.3335 0.1938 0.5959 0.027 Uiso 1 1 calc R . .
H3B H 0.2144 0.2383 0.4611 0.027 Uiso 1 1 calc R . .
O2 O -0.0574(8) 0.7266(8) 0.3485(10) 0.034(2) Uani 1 1 d . . .
O1 O 0.1645(9) 0.6848(8) 0.3942(10) 0.033(2) Uani 1 1 d . . .
O9 O 0.4852(6) 0.6580(8) 0.4637(8) 0.0231(15) Uani 1 1 d . . .
O4 O 0.3186(8) 0.8832(7) 0.3551(10) 0.029(2) Uani 1 1 d . . .
O5 O 0.3268(7) 0.5518(8) 0.0803(8) 0.0249(17) Uani 1 1 d . . .
O6 O 0.1347(7) 0.9862(8) 0.3661(9) 0.0273(18) Uani 1 1 d . . .
O11 O 0.4151 0.7917 0.1866 0.0251(17) Uani 1 1 d D . .
O10 O 0.1044(7) 0.5018(8) 0.1456(10) 0.0254(18) Uani 1 1 d D . .
O8 O 0.3694(8) 0.4502(8) 0.6111(10) 0.033(2) Uani 1 1 d . . .
O7 O 0.3198(8) 0.4274(8) 0.3616(9) 0.031(2) Uani 1 1 d . . .
O3 O 0.1087(7) 0.7365(8) 0.5843(9) 0.0249(17) Uani 1 1 d . . .
S1 S 0.0643(2) 0.6769(2) 0.4430(3) 0.0170(5) Uani 1 1 d . . .
S2 S 0.2707(2) 0.9742(2) 0.4266(3) 0.0156(5) Uani 1 1 d . . .
S3 S 0.3820(2) 0.3738(2) 0.5030(3) 0.0176(5) Uani 1 1 d . . .
H11A H 0.4005 0.8637 0.1860 0.03(4) Uiso 1 1 d D . .
H11B H 0.434(15) 0.774(16) 0.120(12) 0.06(5) Uiso 1 1 d D . .
H10A H 0.029(6) 0.526(18) 0.118(19) 0.07(6) Uiso 1 1 d D . .
H10B H 0.119(15) 0.425(5) 0.170(18) 0.05(5) Uiso 1 1 d D . .

loop_
_atom_site_aniso_label
_atom_site_aniso_U_11
_atom_site_aniso_U_22
_atom_site_aniso_U_33
_atom_site_aniso_U_23
_atom_site_aniso_U_13
_atom_site_aniso_U_12
Bi1 0.01422(16) 0.01725(18) 0.01524(18) 0.00061(17) 0.00612(12) 0.00092(16)
C1 0.019(5) 0.016(5) 0.023(6) -0.001(4) 0.010(4) -0.002(4)
C2 0.025(5) 0.013(5) 0.026(6) 0.001(4) 0.015(5) -0.004(4)
C3 0.025(5) 0.013(5) 0.032(7) -0.002(4) 0.016(5) -0.003(4)
O2 0.027(4) 0.021(4) 0.036(6) 0.002(4) -0.003(4) 0.000(3)
O1 0.044(5) 0.022(4) 0.046(6) -0.002(4) 0.031(5) -0.008(4)
O9 0.015(3) 0.025(4) 0.027(4) 0.002(4) 0.007(3) -0.001(3)
O4 0.037(5) 0.015(4) 0.048(6) -0.008(4) 0.029(4) -0.003(3)
O5 0.026(4) 0.026(4) 0.023(4) -0.007(3) 0.011(3) 0.000(3)
O6 0.016(3) 0.033(5) 0.032(5) 0.001(4) 0.008(3) -0.003(3)
O11 0.035(4) 0.019(4) 0.030(5) 0.000(3) 0.022(4) 0.000(3)
O10 0.018(4) 0.021(4) 0.032(5) 0.004(3) 0.005(3) -0.001(3)
O8 0.038(5) 0.021(4) 0.047(6) -0.010(4) 0.026(4) -0.005(4)
O7 0.028(4) 0.023(4) 0.029(5) 0.007(3) -0.002(4) -0.001(3)
O3 0.025(4) 0.027(4) 0.022(4) -0.009(3) 0.011(3) -0.010(3)
S1 0.0192(11) 0.0135(12) 0.0180(12) -0.0012(9) 0.0075(10) -0.0029(9)
S2 0.0174(10) 0.0122(11) 0.0192(13) 0.0011(9) 0.0095(10) -0.0005(9)
S3 0.0162(10) 0.0114(11) 0.0231(14) -0.0001(9) 0.0063(10) -0.0015(9)

_geom_special_details            
;
 All esds (except the esd in the dihedral angle between two l.s. planes)
 are estimated using the full covariance matrix.  The cell esds are taken
 into account individually in the estimation of esds in distances, angles
 and torsion angles; correlations between esds in cell parameters are only
 used when they are defined by crystal symmetry.  An approximate (isotropic)
 treatment of cell esds is used for estimating esds involving l.s. planes.
;

loop_
_geom_bond_atom_site_label_1
_geom_bond_atom_site_label_2
_geom_bond_distance
_geom_bond_site_symmetry_2
_geom_bond_publ_flag
Bi1 O3 2.284(8) 4_575 ?
Bi1 O5 2.324(8) . ?
Bi1 O10 2.420(8) . ?
Bi1 O11 2.4249(5) . ?
Bi1 O1 2.427(9) . ?
Bi1 O9 2.510(7) . ?
Bi1 O4 2.590(8) . ?
Bi1 O7 2.591(8) . ?
C1 C1 1.514(19) 3_566 ?
C1 S1 1.770(10) . ?
C1 H1A 0.9700 . ?
C1 H1B 0.9700 . ?
C2 C3 1.517(15) 1_565 ?
C2 S2 1.765(10) . ?
C2 H2A 0.9700 . ?
C2 H2B 0.9700 . ?
C3 C2 1.517(15) 1_545 ?
C3 S3 1.776(10) . ?
C3 H3A 0.9700 . ?
C3 H3B 0.9700 . ?
O2 S1 1.433(9) . ?
O1 S1 1.459(8) . ?
O9 S3 1.465(7) 3_666 ?
O4 S2 1.456(8) . ?
O5 S2 1.486(8) 4_575 ?
O6 S2 1.434(8) . ?
O11 H11A 0.76648(16) . ?
O11 H11B 0.83(2) . ?
O10 H10A 0.83(2) . ?
O10 H10B 0.84(2) . ?
O8 S3 1.442(9) . ?
O7 S3 1.457(9) . ?
O3 S1 1.483(8) . ?
O3 Bi1 2.284(8) 4_576 ?
S2 O5 1.486(8) 4_576 ?
S3 O9 1.465(7) 3_666 ?

loop_
_geom_angle_atom_site_label_1
_geom_angle_atom_site_label_2
_geom_angle_atom_site_label_3
_geom_angle
_geom_angle_site_symmetry_1
_geom_angle_site_symmetry_3
_geom_angle_publ_flag
O3 Bi1 O5 93.8(3) 4_575 . ?
O3 Bi1 O10 73.0(3) 4_575 . ?
O5 Bi1 O10 77.9(3) . . ?
O3 Bi1 O11 87.6(2) 4_575 . ?
O5 Bi1 O11 70.6(2) . . ?
O10 Bi1 O11 141.6(2) . . ?
O3 Bi1 O1 83.6(3) 4_575 . ?
O5 Bi1 O1 155.7(3) . . ?
O10 Bi1 O1 78.3(3) . . ?
O11 Bi1 O1 133.15(19) . . ?
O3 Bi1 O9 149.1(3) 4_575 . ?
O5 Bi1 O9 103.9(3) . . ?
O10 Bi1 O9 135.1(3) . . ?
O11 Bi1 O9 75.06(17) . . ?
O1 Bi1 O9 89.8(3) . . ?
O3 Bi1 O4 79.0(3) 4_575 . ?
O5 Bi1 O4 133.6(3) . . ?
O10 Bi1 O4 139.3(3) . . ?
O11 Bi1 O4 63.44(18) . . ?
O1 Bi1 O4 69.7(3) . . ?
O9 Bi1 O4 70.3(3) . . ?
O3 Bi1 O7 137.1(3) 4_575 . ?
O5 Bi1 O7 82.8(3) . . ?
O10 Bi1 O7 64.5(3) . . ?
O11 Bi1 O7 129.88(19) . . ?
O1 Bi1 O7 82.8(3) . . ?
O9 Bi1 O7 71.2(3) . . ?
O4 Bi1 O7 132.2(3) . . ?
C1 C1 S1 111.1(9) 3_566 . ?
C1 C1 H1A 109.4 3_566 . ?
S1 C1 H1A 109.4 . . ?
C1 C1 H1B 109.4 3_566 . ?
S1 C1 H1B 109.4 . . ?
H1A C1 H1B 108.0 . . ?
C3 C2 S2 110.5(7) 1_565 . ?
C3 C2 H2A 109.6 1_565 . ?
S2 C2 H2A 109.6 . . ?
C3 C2 H2B 109.6 1_565 . ?
S2 C2 H2B 109.6 . . ?
H2A C2 H2B 108.1 . . ?
C2 C3 S3 111.7(7) 1_545 . ?
C2 C3 H3A 109.3 1_545 . ?
S3 C3 H3A 109.3 . . ?
C2 C3 H3B 109.3 1_545 . ?
S3 C3 H3B 109.3 . . ?
H3A C3 H3B 107.9 . . ?
S1 O1 Bi1 160.1(6) . . ?
S3 O9 Bi1 136.0(5) 3_666 . ?
S2 O4 Bi1 141.4(5) . . ?
S2 O5 Bi1 140.3(5) 4_575 . ?
Bi1 O11 H11A 114.154(14) . . ?
Bi1 O11 H11B 122(10) . . ?
H11A O11 H11B 110(10) . . ?
Bi1 O10 H10A 120(10) . . ?
Bi1 O10 H10B 118(10) . . ?
H10A O10 H10B 116(10) . . ?
S3 O7 Bi1 137.0(5) . . ?
S1 O3 Bi1 141.5(5) . 4_576 ?
O2 S1 O1 115.8(6) . . ?
O2 S1 O3 111.3(5) . . ?
O1 S1 O3 109.7(5) . . ?
O2 S1 C1 109.3(5) . . ?
O1 S1 C1 105.4(5) . . ?
O3 S1 C1 104.7(5) . . ?
O6 S2 O4 114.7(5) . . ?
O6 S2 O5 112.8(5) . 4_576 ?
O4 S2 O5 110.8(5) . 4_576 ?
O6 S2 C2 108.3(5) . . ?
O4 S2 C2 105.5(5) . . ?
O5 S2 C2 103.9(5) 4_576 . ?
O8 S3 O7 114.8(6) . . ?
O8 S3 O9 112.6(5) . 3_666 ?
O7 S3 O9 110.2(5) . 3_666 ?
O8 S3 C3 106.0(5) . . ?
O7 S3 C3 106.8(5) . . ?
O9 S3 C3 105.9(5) 3_666 . ?

_diffrn_measured_fraction_theta_max 0.989
_diffrn_reflns_theta_full        29.45
_diffrn_measured_fraction_theta_full 0.989
_refine_diff_density_max         0.902
_refine_diff_density_min         -1.836
_refine_diff_density_rms         0.175
